# Supplementary material for: Facile Synthesis of N, S-Doped Carbon Quantum Dots from Food Waste as Fluorescent Probe for Sensitive Detection of Thiamphenicol and Its Analogues in Real Food Samples along with an Application in Bioimaging
Source: MDPI journal article supplement (doi:10.3390/foods11162414), 2022-08-11
Supplement: s1 [file s1]

## **Supplementary Material**

**Facile synthesis of N, S-doped carbon quantum dots from food waste as fluorescent probe for sensitive detection of thiamphenicol and its analogues in real food samples along with an application in bioimaging**

**Shujuan Chen <sup>a,1,\*</sup>, Wanlin Ouyang <sup>a,b,1</sup>, Jianlin Zhang <sup>a</sup>, Li He <sup>a</sup>, Likou Zou <sup>c</sup>,  
Xiaolin Ao <sup>a</sup>, Shuliang Liu <sup>a</sup>, Yong Yang <sup>a</sup>, Jianlong Li <sup>a</sup>**

**<sup>a</sup> College of Food Science, Sichuan Agricultural University, Ya'an, Sichuan  
625014, PR China**

**<sup>b</sup> Yi'yang Agricultural Products Quality Inspection and Testing Center, Yi'yang,  
Hunan 413000, PR China**

**<sup>c</sup> College of Resources, Sichuan Agricultural University, Chengdu, Sichuan  
611130, PR China**

**<sup>1</sup> The authors contributed equally to this work.**

**\*Correspondence: chenshujuan1@163.com (Shujuan Chen).**

**Table S1.** Comparison of N, S-CDs prepared from different precursor.

| Precursor                                       | Quantum Yield | Cell viability | Detection objects                                                                                | Samples                     | Ref.     |
|-------------------------------------------------|---------------|----------------|--------------------------------------------------------------------------------------------------|-----------------------------|----------|
| L-cysteine                                      | 12.6%         | Not mentioned  | Hg <sup>2+</sup>                                                                                 | Lake water sample           | [16]     |
| Citrate                                         | 16.1%         | 85%            | Hg <sup>2+</sup>                                                                                 | Tap/drinking water          | [17]     |
| C <sub>3</sub> N <sub>3</sub> S <sub>3</sub>    | 30.4%         | 80%            | TC                                                                                               | Living cells                | [18]     |
| Thiosemicarbazide                               | 12%           | Not mentioned  | Cr <sup>6+</sup>                                                                                 | distilled water             | [19]     |
| Cystamine dihydrochloride                       | 39.7%         | 78 %           | Cr <sup>6+</sup>                                                                                 | deionized water             | [20]     |
| 1, 6-hexanediamine dihydrochloride              | 24%           | 81 %           | Mn <sup>7+</sup>                                                                                 | DI water                    | [21]     |
| Citric acid                                     | 17.6%         | Not mentioned  | Hg <sup>2+</sup>                                                                                 | Circumstance water          | [22]     |
| P. oceanica leaf、ethylenediamine and cysteamine | 10.6%         | Not mentioned  | Fe <sup>3+</sup> 、Cr <sub>2</sub> O <sub>7</sub> <sup>2-</sup> 、CrO <sub>4</sub> <sup>2-</sup> . | water                       | [46]     |
| Rice and N-acetyl-L-cysteine                    | 7.37%         | Not mentioned  | -                                                                                                | -                           | [47]     |
| Frying oil and concentrated sulfuric acid       | 3.66%         | 90%            | -                                                                                                | -                           | [48]     |
| N, S-CDs                                        | 50.2%         | 92%            | TAP                                                                                              | Milk、 fish and living cells | Our work |

**Table S2.** Comparison of fluorescence response of N, S-CDs prepared from different food wastes and dopant to TAP.

| Carbon precursor | N, S Dopant            | FL intensity (F <sub>0</sub> ) | After TAP (F) | (F <sub>0</sub> -F)/F <sub>0</sub> |
|------------------|------------------------|--------------------------------|---------------|------------------------------------|
| Pitaya peel      | -                      | 215.4                          | 201.9         | 0.063                              |
|                  | Thiamine hydrochloride | 382.6                          | 365.1         | 0.045                              |
|                  | L-cysteine             | 575.7                          | 427.69        | 0.25                               |
|                  | Thioacetamide          | 581.64                         | 482.33        | 0.17                               |
| Grapefruit peel  | -                      | 821.6                          | 792.7         | 0.035                              |
|                  | Thiamine hydrochloride | 1342.8                         | 1160          | 0.14                               |
|                  | L-cysteine             | 1187.7                         | 1289.2        | -0.085                             |
|                  | Thioacetamide          | 1594.3                         | 896.6         | 0.44                               |
| Bamboo shell     | -                      | 184.6                          | 190.9         | -0.03                              |
|                  | Thiamine hydrochloride | 318.9                          | 355.2         | -0.11                              |
|                  | L-cysteine             | 385.2                          | 390           | -0.012                             |
|                  | Thioacetamide          | 403.1                          | 426.7         | -0.059                             |
| Fish scales      | -                      | 1225.5                         | 878.1         | 0.28                               |
|                  | Thiamine hydrochloride | 2412                           | 2090.3        | 0.13                               |
|                  | L-cysteine             | 2033.5                         | 1553.2        | 0.24                               |
|                  | Thioacetamide          | 1846.5                         | 1417.8        | 0.23                               |
| Crayfish shell   | -                      | 3549.6                         | 2268.1        | 0.36                               |
|                  | Thiamine hydrochloride | 5711                           | 3100.8        | 0.46                               |
|                  | L-cysteine             | 6286.2                         | 2547.9        | 0.71                               |
|                  | Thioacetamide          | 5102.4                         | 4062          | 0.40                               |
| Chicken feather  | -                      | 1066.7                         | 1084.3        | -0.016                             |
|                  | Thiamine hydrochloride | 1147.4                         | 1189.7        | -0.037                             |
|                  | L-cysteine             | 1169.1                         | 1213.8        | -0.038                             |
|                  | Thioacetamide          | 1289.8                         | 1459.7        | -0.13                              |

**Table S3.** Effect of interfering substances of C-dots-TAP solution system.

| Interfering substances | Concentration (mg·L <sup>-1</sup> ) | Relative error (%) | Interfering substances | Concentration (mg·L <sup>-1</sup> ) | Relative error (%) |
|------------------------|-------------------------------------|--------------------|------------------------|-------------------------------------|--------------------|
| Na <sup>+</sup>        | 5000                                | +0.65              | Sucrose                | 500                                 | +0.35              |
| Cl <sup>-</sup>        | 5000                                | +1.69              | Glucose                | 500                                 | +1.39              |
| K <sup>+</sup>         | 5000                                | +0.78              | Fructose               | 500                                 | +0.38              |
| Mg <sup>2+</sup>       | 1000                                | -0.23              | Urea                   | 500                                 | +0.67              |
| Ca <sup>2+</sup>       | 1000                                | +0.98              | L-ascorbic acid        | 100                                 | +1.27              |

**Notes:** C<sub>TAP</sub>=100 µg·L<sup>-1</sup>, n=6.

**Table S4.** Comparison of different research temperatures for the calculated KSV values.

| Temperature (±1K)        | 288.15 | 303.15 | 318  |
|--------------------------|--------|--------|------|
| Ksv (*10 <sup>-3</sup> ) | 1.35   | 1.2    | 1.15 |

**Table S5.** Specification information for N, S-CDs.

| Sample   | Information            |                          |            |
|----------|------------------------|--------------------------|------------|
| N, S-CDs | Synthetic substance    | Crayfish shell           | L-cysteine |
|          | Concentration          | 1.75 mg·mL <sup>-1</sup> |            |
|          | pH                     | 8                        |            |
|          | Fluorescence stability | 80 days                  |            |
|          | Fluorescence lifetime  | 1.72 ns                  |            |
|          | Ex/Em                  | Ex: 372nm                | Em: 446nm  |

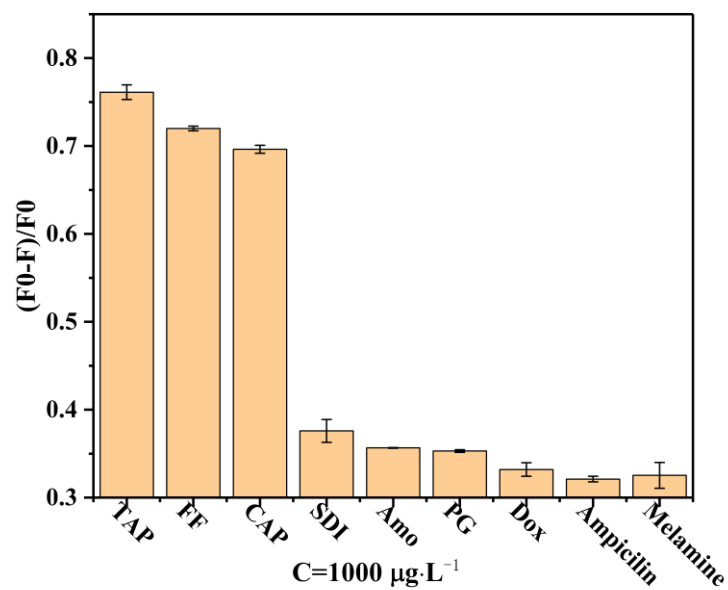

**Figure S1.** selectivity of the N, S-CDs to different kinds of antibiotics.

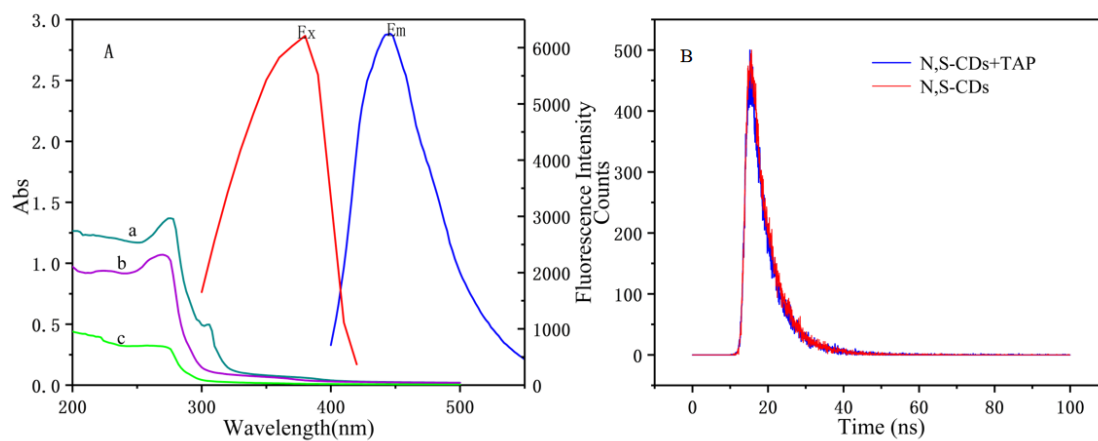

**Figure S2.** (A) N, S-CDs in the presence (a) and absence (b) of TAP, and (c) Absorption spectra of the TAP; (B) Fluorescence decay curves of pure N, S-CDs and N, S-CDs after interacting with TAP.

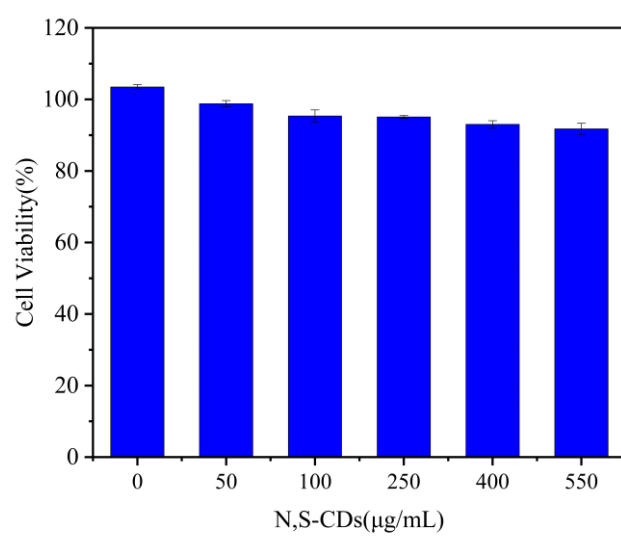

**Figure. S3.** Cytotoxicity of the N, S-CDs toward Hela cells.
